# Supplementary material for: Thermoreversible cross-linking of ethylene/propylene copolymer rubbers
Source: Royal Society of Chemistry journal article supplement (doi:10.1039/c7py00896a), 2017-01-01
Supplement: c7py00896a1.pdf [file c7py00896a1.pdf]

## Supporting Information

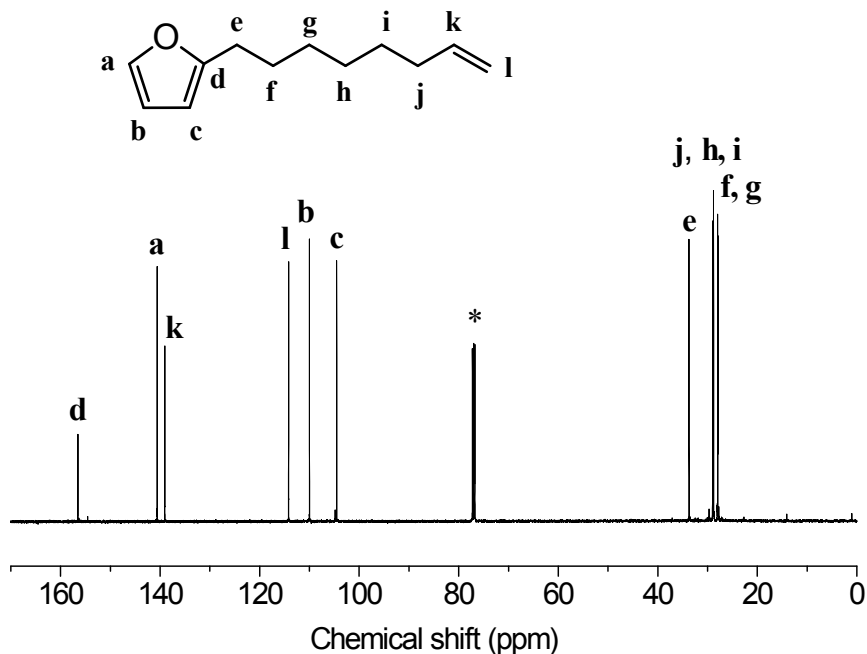

Fig S1  $^{13}\text{C}$ -NMR spectrum of 8-furyl-1-octene (Solvent: chloroform-*d*; temp.: 20°C)

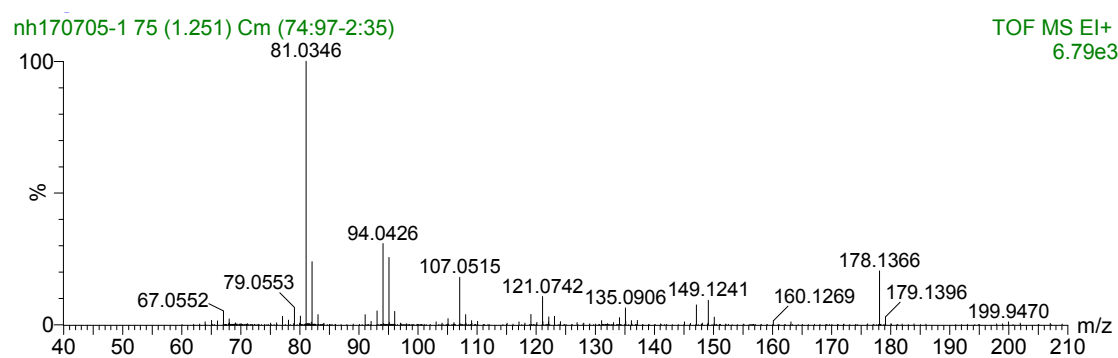

Fig S2 Mass spectrum of 8-furyl-1-octene
